# Supplementary material for: Post-Intensive Care Syndrome Associated With Coronavirus Disease: A Single Institutional Study In Tokyo
Source: Research Square preprint supplement (doi:10.21203/rs.3.rs-387067/v1), 2021-04-06
Supplement: Supplementary file 1 [file 7723cbdbd0a475e580d66167.xlsx]

## Sheet: Table Social
Table Changes of social and living status before and after COVID-19
	Baseline	4 months
Social status
Employed/Self-employed	16 (80)	16 (80)
Full recovery	-	12 (75)
Partial recovery	-	4 (25)
Unemployed	4 (20)	4 (20)
Living Status
Alone	10 (50)	9 (45)
With family	10 (50)	10 (50)
Long-term hospital	0 (0)	1 (5)
脱毛	3
末梢神経症状？	3

## Sheet: Table supplemental
	Total	PCFS			mMRC			IES-R			HADS Anxiety			HADS Depression
	20	≧1 (11)	0 (7)	p value	≧1 (12)	0 (5)	p value	≧25 (7)	<25 (13)	p value	≧8 (9)	<8 (11)	p value	≧8 (6)	<8 (14)	p value
Baseline characteristics
Age, median (IQR), years	57.5 (48.8, 71.3)	58 (46, 74.5)	56 (48.5, 59)	0.5	57.5 (54.8, 73.3)	48.0 (47.0, 61.0)	0.25	58.0 (48.5, 66.5)	56.0 (49.0, 71.0)	0.75	58.0 (51.0, 72.0)	56.0 (48.5, 67.0)	0.97	59.5 (57.3, 69.3)	56.0 (47.3, 69.0)	0.39
Male, n (%)	16 (80)	8 (73)	7 (100)	0.25	9 (75)	5 (100)	0.51	5 (71)	11 (85)	0.59	6 (67)	10 (91)	0.28	4 (67)	12 (86)	0.55
BMI, median (IQR), kg/m2	24.4 (22.0, 28.7)	24.3 (22.1, 29.4)	24.5 (21.2, 27.8)	0.89	25.0 (22.3, 30.7)	22.0 (21.2, 24.5)	0.25	24.3 (21.0, 29.4)	24.5 (22.1, 26.4)	0.84	22.3 (22.0, 28.5)	24.9 (22.2, 27.8)	0.52	22.2 (22.0, 23.8)	25.3 (22.0, 29.1)	0.25
Comorbidities
Respiratory comorbidities*, n (%)	7 (35)	5 (45)	1 (14)	0.32	3 (25)	2 (40)	0.6	3 (43)	4 (31)	0.65	4 (44)	3 (27)	0.64	2 (33)	5 (36)	1
Current or former smoker, n (%)	14 (70)	7 (64)	5 (71)	1	6 (50)	5 (100)	0.12	5 (71)	9 (69)	1	6 (67)	8 (73)	0.63	3 (50)	11 (79)	0.26
Lifestyle comorbidities†, n (%)	13 (65)	6 (55)	6 (86)	0.64	9 (75)	2 (40)	0.28	3 (43)	10 (77)	0.17	4 (44)	9 (82)	0.16	2 (33)	11 (79)	0.12
Living alone, n (%)	10 (50)	5 (45)	3 (43)	1	7 (58)	0 (0)	0.04	2 (29)	8 (62)	0.35	4 (44)	6 (55)	1	2 (33)	8 (57)	0.63
Married, n (%)	11 (55)	7 (64)	3 (43)	0.63	6 (50)	4 (80)	0.34	6 (86)	5 (38)	0.07	6 (67)	5 (45)	0.41	4 (67)	7 (50)	0.64
ICU scores, treatments and events
SOFA, median (IQR)	6.0 (3.0, 8.0)	6.0 (3.5, 7.0)	6 (3.5, 8.0)	0.82	5.0 (3.0, 7.0)	8.0 (5.0, 8.0)	0.24	6.0 (4.0, 7.5)	6.0 (3.0, 8.0)	0.72	6.0 (4.0, 7.0)	6.0 (3.0, 8.0)	0.94	5.0 (4.0, 6.0)	6.5 (3.0, 8.0)	0.77
APACHE-II, median (IQR)	18.0 (12.5, 20.5)	18.0 (15.0, 21.0)	13.0 (10.5, 15.5)	0.27	18.0 (12.5, 20.5)	13.0 (9.0, 18.0)	0.43	17.0 (11.0, 18.5)	18.0 (13.0, 22.0)	0.4	18.0 (13.0, 19.0)	18.0 (12.0 22.0)	0.67	18.0 (17.3, 19.5)	15.5 (10.3, 21.3)	0.46
APACHE-III, median (IQR)	52.0 (40.0, 82.0)	46.0 (40.0, 80.0)	49.5 (41.0, 68.5)	0.96	52.0 (42.0, 76.0)	44.0 (37.0, 86.0)	0.73	46.0 (38.0, 65.5)	64.0 (43.0, 83.8)	0.27	46.0 (40.0, 79.0)	64.0 (44.0, 82.5)	0.41	43.0 (40.0, 89.5)	55.0 (44.0, 81.0)	0.73
SAPS-II, median (IQR)	31.0 (21.5, 42.5)	31.0 (19.0, 46.5)	28.5 (26.3, 36.0)	0.96	31.0 (21.5, 42.0)	30.0 (26.0, 39.0)	0.91	31.0 (20.5, 39.0)	30.5 (24.5, 41.0)	0.61	31.0 (20.0, 46.0)	30.5 (26.3, 38.8)	0.77	27.5 (20.8, 47.0)	31.0 (26.0, 39.0)	0.9
Invasive mechanical ventilation, n (%)	16 (80)	9 (82)	6 (86)	1	9 (75)	5 (100)	0.51	6 (86)	10 (77)	1	7 (78)	9 (82)	1	4 (67)	12 (86)	0.55
Days of invasive mechanical ventilation, median (IQR), days	5.0 (3.8, 8.3)	5.0 (3.0, 12.0)	5.5 (5.0, 6.8)	0.63	5.0 (4.0, 21.0)	5.0 (4.0, 6.0)	0.59	6.0 (3.0, 10.8)	5.0 (4.3, 3.0)	0.58	7.0 (3.0, 4.0)	5.0 (4.0, 6.0)	0.79	7.5 (3.0, 19.0)	5.0 (4.0, 7.0)	1
Extracorporeal membrane oxygenation, n (%)	1 (5)	0 (0)	1 (14)	0.39	1 (8)	0 (0)	1	1 (14)	0 (0)	1	0 (0)	1 (9)	1	0 (0)	1 (7)	1
Tracheostomy, n (%)	3 (15)	2 (18)	1 (14)	1	3 (25)	0 (0)	0.51	1 (14)	2 (15)	1	2 (22)	1 (9)	0.57	1 (17)	2 (14)	1
Renal replacement therapy, n (%)	1 (5)	0 (0)	1 (14)	0.39	1 (8)	0 (0)	1	0	1 (8)	1	0 (0)	1 (9)	1	0 (0)	1 (7)	1
Systemic steroids, n (%)	15 (75)	10 (91)	4 (57)	0.25	11 (92)	2 (40)	0.05	6 (86)	9 (69)	0.61	8 (89)	7 (64)	0.32	6 (100)	9 (64)	0.26
Continuous benzodiazepine, n (%)	5 (25)	3 (27)	1 (14)	1	4 (33)	0 (0)	0.26	2 (29)	3 (23)	1	3 (33)	2 (18)	0.62	1 (17)	4 (29)	1
Occurrence of delirium, n (%)	8 (40)	5 (45)	3 (43)	1	6 (50)	1 (20)	0.34	3 (43)	5 (38)	1	4 (44)	4 (46)	1	2 (33)	6 (43)	1
Outcomes
ICU stay, median (IQR), days	6.0 (4.0, 11.5)	6.0 (4.5, 12.0)	6.0 (5.5, 12.0)	0.68	6.5 (5.0, 16.8)	6.0 (4.0, 6.0)	0.4	7.0 (5.0, 12.0)	6.0 (4.0, 9.0)	0.63	7.0 (4.0, 13.0)	6.0 (4.5, 7.5)	0.62	6.5 (3.8, 11.5)	6.0 (4.3, 10.5)	0.97
Hospital stay, median (IQR), days	21.0 (17.8, 36.5)	19.0 (17.5, 34.0)	24.0 (18.5, 33.5)	0.65	24.5 (17.8, 44.3)	19.0 (19.0, 24.0)	0.53	19.0 (18.5, 28.0)	24.0 (16.0, 41.0)	0.87	19.0 (18.0, 33.0)	24.0 (17.0, 38.0)	0.88	21.0 (18.3, 30.5)	21.5 (17.3, 39.5)	0.9
Discharged to other hospital, or hotel, n (%)	4 (20)	3 (27)	1 (14)	1	4 (33)	0 (0)	0.26	2 (29)	2 (15)	0.59	3 (33)	1 (9)	0.28	2 (33)	2 (14)	0.55
Data are expressed as numbers (percentage), or median (interquartile range). *Includes chronic respiratory disease and asthma. †Includes hypertension, diabetes mellitus, dyslipidemia, and obesity. ‡Patients who had repeated positive reverse-transcriptase polymerase chain reaction tests required isolation at an observatory hotel before discharge.
